# Supplementary material for: Association of HBB Gene Variants with Laboratory Profiles and Comorbidities in Taiwanese beta thalassemia carriers: A Case–Control Study
Source: Research Square preprint supplement (doi:10.21203/rs.3.rs-7082804/v1), 2025-07-28
Supplement: Supplementary file 1 [file 22b39f6dbda733f967e3e982.docx]

**Supplementary Table 1.** List of two HBB variants (rs34451549 and rs80356821) , with corresponding genomic information, and allele frequencies in our cohort.

| **CHROM** | **POS** | **rsID** | **Gene** | **REF** | **ALT** | **MAF** | db SNP |
| --- | --- | --- | --- | --- | --- | --- | --- |
| 11 | 5225923 (GRCh38) | rs34451549 | HBB | G | A | 0.00159 | https://www.ncbi.nlm.nih.gov/snp/rs34451549 |
| 11 | 5226762 (GRCh38) | rs80356821 | HBB | CAAAG | C | 0.00232 | https://www.ncbi.nlm.nih.gov/snp/rs80356821 |

**Supplementary Table 2. Risk of hypertension in the study population.**

| Variable | Multivariable logistic regression, model 1 | | | Multivariable logistic regression, model 2 | | | Multivariable logistic regression, model 3 | | |
| --- | --- | --- | --- | --- | --- | --- | --- | --- | --- |
| aOR | 95% CI | P-value | aOR | 95% CI | P-value | aOR | 95% CI | P-value |
| **Age, years** |  |  |  |  |  |  |  |  |  |
| **Gender** |  |  |  |  |  |  |  |  |  |
| female |  |  |  |  |  |  |  |  |  |
| male |  |  |  |  |  |  |  |  |  |
| **BTC** |  |  |  |  |  |  |  |  |  |
| No | 1.00 | - | - |  |  |  |  |  |  |
| Yes | 0.88 | 0.58-1.33 | 0.542 |  |  |  |  |  |  |
| **rs34451549** |  |  |  |  |  |  |  |  |  |
| No |  |  |  | 1.00 | - | - |  |  |  |
| Yes |  |  |  | 0.90 | 0.54-1.52 | 0.703 |  |  |  |
| **rs80356821** |  |  |  |  |  |  |  |  |  |
| No |  |  |  |  |  |  | 1.00 | - | - |
| Yes |  |  |  |  |  |  | 0.93 | 0.59-1.45 | 0.745 |
| **BMI** | 1.00 | 0.99-1.01 | 0.648 | 1.00 | 0.99-1.01 | 0.645 | 1.00 | 0.99-1.01 | 0.645 |
| **Diabetes mellitus (DM)** | 2.09 | 1.73-2.52 | < 0.001 | 2.09 | 1.73-2.53 | < 0.001 | 2.09 | 1.73-2.53 | < 0.001 |
| **Hyperlipidemia (HLD)** | 1.77 | 1.47-2.12 | < 0.001 | 1.77 | 1.48-2.12 | < 0.001 | 1.77 | 1.48-2.12 | < 0.001 |
| **Chronic kidney disease (CKD)** | 2.85 | 2.34-3.49 | < 0.001 | 2.86 | 2.34-3.49 | < 0.001 | 2.86 | 2.34-3.49 | < 0.001 |
|  |  |  |  |  |  |  |  |  |  |
| **Hemoglobin (Hb)** | 0.98 | 0.94-1.03 | 0.476 | 0.98 | 0.94-1.03 | 0.493 | 0.98 | 0.94-1.03 | 0.490 |
| **Mean corpuscular volume (MCV)** | 0.99 | 0.97-1.02 | 0.525 | 0.99 | 0.97-1.02 | 0.578 | 0.99 | 0.97-1.02 | 0.580 |
| **Mean corpuscular hemoglobin (MCH)** | 1.02 | 0.95-1.08 | 0.634 | 1.02 | 0.95-1.08 | 0.604 | 1.02 | 0.95-1.08 | 0.607 |
| **Total Bilirubin** | 1.02 | 0.96-1.11 | 0.474 | 1.02 | 0.96-1.09 | 0.507 | 1.02 | 0.96-1.09 | 0.495 |
| **Creatinine** | 1.03 | 0.99-1.07 | 0.205 | 1.03 | 0.99-1.07 | 0.206 | 1.03 | 0.99-1.07 | 0.203 |
| **eGFR (estimate GFR)** | 0.995 | 0.991-0.998 | < 0.001 | 0.995 | 0.991-0.998 | < 0.001 | 0.995 | 0.991-0.998 | < 0.001 |

In multivariable logistic regression analyses, ORs were adjusted for age, sex, BMI, and variables as indicated in the table.

**Supplementary Table 3. Risk of hyperlipidemia in the study population.**

| Variable | Multivariable logistic regression, model 1 | | | Multivariable logistic regression, model 2 | | | Multivariable logistic regression, model 3 | | |
| --- | --- | --- | --- | --- | --- | --- | --- | --- | --- |
| aOR | 95% CI | P-value | aOR | 95% CI | P-value | aOR | 95% CI | P-value |
| **Age, years** |  |  |  |  |  |  |  |  |  |
| **Gender** |  |  |  |  |  |  |  |  |  |
| female |  |  |  |  |  |  |  |  |  |
| male |  |  |  |  |  |  |  |  |  |
| **BTC** |  |  |  |  |  |  |  |  |  |
| No | 1.00 | - | - |  |  |  |  |  |  |
| Yes | 0.63 | 0.42-0.96 | 0.029 |  |  |  |  |  |  |
| **rs34451549** |  |  |  |  |  |  |  |  |  |
| No |  |  |  | 1.00 | - | - |  |  |  |
| Yes |  |  |  | 0.69 | 0.41-1.15 | 0.154 |  |  |  |
| **rs80356821** |  |  |  |  |  |  |  |  |  |
| No |  |  |  |  |  |  | 1.00 | - | - |
| Yes |  |  |  |  |  |  | 0.78 | 0.50-1.21 | 0.266 |
| **BMI** | 1.00 | 0.99-1.01 | 0.761 | 1.00 | 0.99-1.01 | 0.751 | 1.00 | 0.99-1.01 | 0.750 |
| **Hypertension** | 1.79 | 1.49-2.14 | < 0.001 | 1.79 | 1.49-2.14 | < 0.001 | 1.79 | 1.50-2.14 | < 0.001 |
| **Diabetes mellitus (DM)** | 3.69 | 3.09-4.40 | < 0.001 | 3.73 | 3.13-4.45 | < 0.001 | 3.73 | 3.13-4.45 | < 0.001 |
| **Chronic kidney disease (CKD)** | 1.53 | 1.26-1.87 | < 0.001 | 1.54 | 1.26-1.87 | < 0.001 | 1.54 | 1.26-1.88 | < 0.001 |
|  |  |  |  |  |  |  |  |  |  |
| **Hemoglobin (Hb)** | 1.09 | 1.04-1.14 | < 0.001 | 1.09 | 1.04-1.14 | < 0.001 | 1.09 | 1.04-1.14 | < 0.001 |
| **Mean corpuscular volume (MCV)** | 0.96 | 0.94-0.99 | 0.003 | 0.97 | 0.94-0.99 | 0.006 | 0.97 | 0.94-0.99 | 0.006 |
| **Mean corpuscular hemoglobin (MCH)** | 1.09 | 1.02-1.16 | 0.007 | 1.09 | 1.03-1.16 | 0.004 | 1.09 | 1.03-1.16 | 0.004 |
| **Total Bilirubin** | 0.92 | 0.83-1.02 | 0.125 | 0.91 | 0.82-1.02 | 0.096 | 0.92 | 0.82-1.02 | 0.100 |
| **Creatinine** | 0.98 | 0.95-1.02 | 0.374 | 0.98 | 0.95-1.02 | 0.371 | 0.98 | 0.95-1.02 | 0.382 |
| **eGFR (estimate GFR)** | 0.996 | 0.993-0.998 | 0.005 | 0.996 | 0.993-0.998 | 0.005 | 0.996 | 0.993-0.999 | 0.006 |

In multivariable logistic regression analyses, ORs were adjusted for age, sex, BMI, and variables as indicated in the table.

**Supplementary Table 4. Risk of chronic kidney disease in the study population.**

| Variable | Multivariable logistic regression, model 1 | | | Multivariable logistic regression, model 2 | | | Multivariable logistic regression, model 3 | | |
| --- | --- | --- | --- | --- | --- | --- | --- | --- | --- |
| aOR | 95% CI | P-value | aOR | 95% CI | P-value | aOR | 95% CI | P-value |
| **Age, years** |  |  |  |  |  |  |  |  |  |
| **Gender** |  |  |  |  |  |  |  |  |  |
| female |  |  |  |  |  |  |  |  |  |
| male |  |  |  |  |  |  |  |  |  |
| **BTC** |  |  |  |  |  |  |  |  |  |
| No | 1.00 | - | - |  |  |  |  |  |  |
| Yes | 0.64 | 0.40-1.04 | 0.070 |  |  |  |  |  |  |
| **rs34451549** |  |  |  |  |  |  |  |  |  |
| No |  |  |  | 1.00 | - | - |  |  |  |
| Yes |  |  |  | 0.51 | 0.27-0.97 | 0.040 |  |  |  |
| **rs80356821** |  |  |  |  |  |  |  |  |  |
| No |  |  |  |  |  |  | 1.00 | - | - |
| Yes |  |  |  |  |  |  | 0.95 | 0.57-1.58 | 0.848 |
| **BMI** | 1.00 | 0.99-1.01 | 0.504 | 1.00 | 0.99-1.01 | 0.508 | 1.00 | 0.99-1.01 | 0.513 |
| **Hypertension** | 2.65 | 2.16-3.25 | < 0.001 | 2.65 | 2.16-3.25 | < 0.001 | 2.65 | 2.16-3.26 | < 0.001 |
| **Diabetes mellitus (DM)** | 1.86 | 1.51-2.30 | < 0.001 | 1.88 | 1.52-2.31 | < 0.001 | 1.89 | 1.53-2.33 | < 0.001 |
| **Hyperlipidemia (HLD)** | 1.40 | 1.14-1.72 | 0.002 | 1.40 | 1.14-1.72 | 0.001 | 1.40 | 1.14-1.72 | 0.001 |
|  |  |  |  |  |  |  |  |  |  |
| **Hemoglobin (Hb)** | 0.86 | 0.81-0.91 | < 0.001 | 0.86 | 0.82-0.91 | < 0.001 | 0.86 | 0.82-0.91 | < 0.001 |
| **Mean corpuscular volume (MCV)** | 0.99 | 0.96-1.02 | 0.485 | 0.99 | 0.96-1.02 | 0.566 | 0.99 | 0.97-1.02 | 0.712 |
| **Mean corpuscular hemoglobin (MCH)** | 1.08 | 1.01-1.16 | 0.029 | 1.09 | 1.01-1.16 | 0.022 | 1.09 | 1.02-1.17 | 0.017 |
| **Total Bilirubin** | 0.85 | 0.75-0.95 | 0.006 | 0.84 | 0.75-0.95 | 0.005 | 0.84 | 0.75-0.94 | 0.004 |
| **Creatinine** | 7.56 | 4.16-13.73 | < 0.001 | 7.62 | 4.2-13.82 | < 0.001 | 7.52 | 4.14-13.65 | < 0.001 |
| **eGFR (estimate GFR)** | 0.985 | 0.979-0.992 | < 0.001 | 0.985 | 0.979-0.992 | < 0.001 | 0.985 | 0.978-0.992 | < 0.001 |

In multivariable logistic regression analyses, ORs were adjusted for age, sex, BMI, and variables as indicated in the table.

**Supplementary Table 5. Multivariable linear regression models predicting estimated glomerular filtration rate (eGFR).**

| **Variables** | **β (95% CI)** | **P-value** |
| --- | --- | --- |
| **rs34451549 (Per risk allele)** | 1.75 (-2.97-6.48) | 0.467 |
| **age（Per 1-year increase in age）** | -0.51 (-0.58--0.45) | < 0.001 |
| **sex（Male vs Female）** | -5.67 (-7.47--3.87) | < 0.001 |
| Hypertension | -7.16 (-9.24--5.08) | < 0.001 |
| Diabetes mellitus | 7.60 (5.51-9.70) | < 0.001 |
| Hyperlipidemia | -2.39 (-4.41--0.38) | 0.020 |
| Chronic kidney disease | -33.79 (-35.78--31.81) | < 0.001 |
|  |  |  |
| **rs80356821 (Per risk allele)** | 6.34 (2.43-10.25) | 0.001 |
| **age（Per 1-year increase in age）** | -0.52 (-0.58--0.45) | < 0.001 |
| **sex（Male vs Female）** | -5.72 (-7.52--3.92) | < 0.001 |
| Hypertension | -7.16 (-9.24--5.08) | < 0.001 |
| Diabetes mellitus | 7.64 (5.55-9.73) | < 0.001 |
| Hyperlipidemia | -2.23 (-4.25--0.22) | 0.030 |
| Chronic kidney disease | -33.66 (-35.64--31.68) | < 0.001 |
|  |  |  |
| **BTC** | 4.73 (1.64-7.83) | 0.003 |
| **age（Per 1-year increase in age）** | -0.52 (-0.58--0.45) | < 0.001 |
| **sex（Male vs Female）** | -5.71 (-7.52--3.91) | < 0.001 |
| Hypertension | -7.16 (-9.23--5.08) | < 0.001 |
| Diabetes mellitus | 7.66 (5.57-9.76) | < 0.001 |
| Hyperlipidemia | -2.21 (-4.23--0.2) | 0.032 |
| Chronic kidney disease | -33.59 (-35.57--31.6) | < 0.001 |
